# Supplementary material for: Larotinib in Patients with Advanced and Previously Treated Esophageal Squamous Cell Carcinoma with Epidermal Growth Factor Receptor Overexpression or Amplification: An Open-Label, Multicenter Phase 1b Study
Source: Research Square preprint supplement (doi:10.21203/rs.3.rs-517047/v2), 2021-07-19
Supplement: Supplementary file 1 [file 06c8dcef3499b3ccd6d2657e.pdf]

**Additional file**

**Article title:** Larotinib in Patients with Advanced and Previously Treated Esophageal Squamous Cell Carcinoma with Epidermal Growth Factor Receptor Overexpression or Amplification: An Open-Label, Multicenter Phase 1b Study

**Journal name:** Cancer Chemotherapy and Pharmacology

**Author names:** Jianming Xu, Lianke Liu, Rongrui Liu, Yuxian Bai, Yulong Zheng, Shu Zhang, Ning Li, Jianwei Yang, Qingxia Fan, Xiuwen Wang, Shan Zeng, Yingjun Zhang, Weihong Zhang, Yulei Zhuang, Ning Kang, Qinghong Zhou, Yingzhi Jiang, Hongmei Sun

**Corresponding authors:** Jianming Xu, Lianke Liu and Rongrui Liu contributed equally to this work, and are considered as joint first authors. [jmxu2003@yahoo.com](mailto:jmxu2003@yahoo.com)

### Additional file 3: Overall Response Assessed by Independent Radiology Review

**Table S2 Confirmed overall response assessed by independent radiology review**

| All patients          | 250 mg        | 300 mg            | 350 mg            | All               |
|-----------------------|---------------|-------------------|-------------------|-------------------|
|                       | n=2           | n=21              | n=49 <sup>a</sup> | n=72 <sup>a</sup> |
| CR, n(%)              | 0             | 0                 | 0                 | 0                 |
| PR, n(%)              | 0             | 2 ( 9.5)          | 8 (16.3)          | 10 (13.9)         |
| SD, n(%)              | 0             | 8 (38.1)          | 22 (44.9)         | 30 (41.7)         |
| PD, n(%)              | 2 (100)       | 9 (42.9)          | 15 (30.6)         | 26 (36.1)         |
| NE, n(%)              | 0             | 2 ( 9.5)          | 4 ( 8.2)          | 6 ( 8.3)          |
| <b>ORR, %(95% CI)</b> | 0 (0.0, 84.2) | 9.5 (1.2, 30.4)   | 16.3(7.3, 29.7)   | 13.9 (6.9, 24.1)  |
| <b>DCR, %(95% CI)</b> | 0 (0.0, 84.2) | 47.6 (25.7, 70.2) | 61.2 (46.2, 74.8) | 55.6 (43.4, 67.3) |

Abbreviations: CR, complete response; PR, partial response; SD, stable disease  $\geq$  6 weeks; PD, progressive disease; NE, not evaluable; ORR, objective response rate; DCR, disease control rate, including CR, PR and SD; CI, confidence interval.

<sup>a</sup> The image of one patient in 350 mg group was evaluated by investigator but not by independent radiology review due to image quality.
