# Supplementary material for: Larotinib in Patients with Advanced and Previously Treated Esophageal Squamous Cell Carcinoma with Epidermal Growth Factor Receptor Overexpression or Amplification: An Open-Label, Multicenter Phase 1b Study
Source: Research Square preprint supplement (doi:10.21203/rs.3.rs-517047/v2), 2021-07-19
Supplement: Supplementary file 3 [file 6c37fcd9a1a6650335873f99.pdf]

## **Additional file 2**

**Article title:** Larotinib in Patients with Advanced and Previously Treated Esophageal Squamous Cell Carcinoma with Epidermal Growth Factor Receptor Overexpression or Amplification: An Open-Label, Multicenter Phase 1b Study

**Journal name:** Cancer Chemotherapy and Pharmacology

**Author names:** Jianming Xu, Lianke Liu, Rongrui Liu, Yuxian Bai, Yulong Zheng, Shu Zhang, Ning Li, Jianwei Yang, Qingxia Fan, Xiuwen Wang, Shan Zeng, Yingjun Zhang, Weihong Zhang, Yulei Zhuang, Ning Kang, Qinghong Zhou, Yingzhi Jiang, Hongmei Sun

**Corresponding authors:** Jianming Xu, Lianke Liu and Rongrui Liu contributed equally to this work, and are considered as joint first authors. [jmxu2003@yahoo.com](mailto:jmxu2003@yahoo.com)

## **Additional file 2: Supplementary Materials and Methods**

### **Protocol revisions**

The study was originally designed as a randomized, open-label, multi-center clinical trial, the treatment groups were 350 mg and 300 mg. After enrolling 10 patients, there were 4 patients (3 of 5 patients in the 350 mg group and 1 of 5 patients in the 300 mg group) required dose reduction due to intolerability. A protocol amendment was made with the dose groups adjusted to 300 mg and 250 mg to ensure subject safety. However, when more safety and efficacy data were collected (one patient in 250 mg group, 15 patients in each 300 mg and 350 mg group), we re-evaluated the safety and efficacy of these three doses, and determined 350 mg to be the effective dose. Therefore, the study was ultimately designed as a single-arm, open-label study at 350 mg dose.
